# Supplementary material for: High Dose Ifosfamide in Relapsed and Unresectable High-Grade Osteosarcoma Patients: A Retrospective Series
Source: PubMed Central journal article supplement (PMC7692098; doi:10.3390/cells9112389), 2020-10-31
Supplement: cells-09-02389-s001.pdf [file cells-09-02389-s001.pdf]

## Supplementary Table S1

Genomic alterations and PARP1 expression in 24 tumor samples from 51 patients treated with high-dose ifosfamide (HDIFO)

|          | <b>Gene alteration*<br/>(allele frequency, copy number)</b> | <b>COSMIC/ClinVar<sup>‡</sup></b> | <b>PolyPhen-2<sup>°</sup></b> | <b>%PARP1 positive tumor cells<sup>§</sup></b> |
|----------|-------------------------------------------------------------|-----------------------------------|-------------------------------|------------------------------------------------|
| met OS1  | n.e.                                                        |                                   |                               | 65                                             |
| met OS2  | WT                                                          |                                   |                               | 60                                             |
| met OS3  | TP53 Leu194Phe (15%)                                        | 200/Likely Pathogenic             | Probably damaging score 1.00  | 60                                             |
| met OS4  | n.e.                                                        |                                   |                               | n.e.                                           |
| met OS5  | WT                                                          |                                   |                               | 60                                             |
| met OS6  | KRAS Gly12Val (31%)                                         | 10690/Pathogenic                  | Probably damaging score 1.00  | 35                                             |
| met OS7  | WT                                                          |                                   |                               | 80                                             |
| met OS8  | n.e.                                                        |                                   |                               | 40                                             |
| met OS9  | n.e.                                                        |                                   |                               | n.e.                                           |
| met OS10 | n.e.                                                        |                                   |                               | 30                                             |
| met OS11 | n.e.                                                        |                                   |                               | 35                                             |
| met OS12 | WT                                                          |                                   |                               | 75                                             |
| met OS13 | n.e.                                                        |                                   |                               | n.e.                                           |
| met OS14 | WT                                                          |                                   |                               | 30                                             |
| met OS15 | n.e.                                                        |                                   |                               | 60                                             |
| met OS16 | WT                                                          |                                   |                               | 60                                             |
| met OS17 | n.e.                                                        |                                   |                               | 55                                             |
| met OS18 | WT                                                          |                                   |                               | 65                                             |
| met OS19 | n.e.                                                        |                                   |                               | n.e.                                           |
| met OS20 | MYC ampl (11 copies);<br>CCNE1 ampl (18 copies)             | 856/Pathogenic<br>312/ Pathogenic |                               | 90                                             |
| met OS21 | n.e.                                                        |                                   |                               | 65                                             |
| met OS22 | n.e.                                                        |                                   |                               | 25                                             |
| met OS23 | WT                                                          |                                   |                               | 65                                             |
| met OS24 | MYC ampl (9 copies)                                         | 856/Pathogenic                    |                               | 70                                             |

\* OncoPrint Comprehensive Cancer panel v3 genes

<sup>‡</sup> Number of observation of the variations as reported in COSMIC database /Significance of the genomic variation in relation to human health

<sup>°</sup> Prediction of functional effects of human nsSNPs and probability score

<sup>§</sup> % of PARP1 positive nuclei after conventional immunostaining and counting on 4 different optical microscopy field by an expert pathologist

WT: wild type; n.e.: not evaluable, the sample did not reach the quality score required for the analysis, insufficient starting material or purity of extracted DNA
